# Supplementary material for: A unique set of 6 circulating microRNAs for early detection of non-small cell lung cancer
Source: PubMed Central journal article supplement (PMC5095073; doi:10.18632/oncotarget.9363), 2016-05-14
Supplement: oncotarget-07-37250-s001.pdf [file oncotarget-07-37250-s001.pdf]

## A unique set of 6 circulating microRNAs for early detection of non-small cell lung cancer

### SUPPLEMENTARY FIGURE AND TABLES

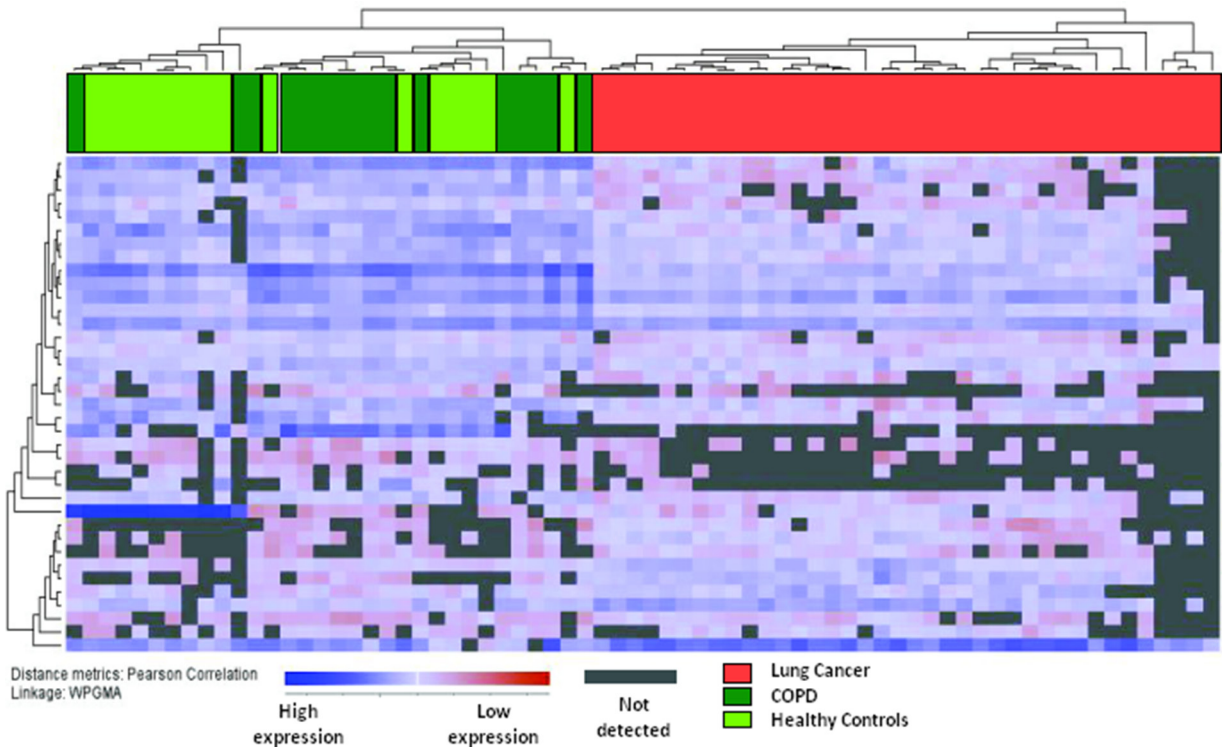

**Supplementary Figure S1: Hierarchical clustering of the 37 microRNAs differentially expressed between lung cancer patients (red) and controls (green).** On the left side of the heatmap, two clusters of microRNAs are seen. The microRNAs in the upper cluster showed a low abundance in lung cancer patients compared with COPD patients and healthy controls. The 10 microRNAs found in the lower cluster showed a higher abundance in lung cancer patients. In the heatmap, blue spots indicate high levels of microRNA, pink spots are low levels, and the grey spots are microRNAs not detected.

Supplementary Table S1: List of 37 significantly differentially expressed miRNAs (FDR=0.01)

|       | ID             | p-value<br>t-test | Fold<br>Change | Express.<br>serum<br>(cancer) |       | ID              | p-value<br>t-test | Fold<br>Change | Express.<br>serum<br>(cancer) |
|-------|----------------|-------------------|----------------|-------------------------------|-------|-----------------|-------------------|----------------|-------------------------------|
| [1,]  | hsa-miR-214    | 5.50E-22          | 125.386        | Down                          | [20,] | hsa-miR-545     | 0.003392          | 23.545         | Down                          |
| [2,]  | hsa-miR-1285   | 5.18E-16          | 74.143         | Down                          | [21,] | hsa-miR-548d-5p | 0.0363388         | 6.896          | Down                          |
| [3,]  | mmu-miR-134    | 1.71E-11          | 12.301         | Down                          | [22,] | hsa-miR-548J    | 0.0008765         | 365.573        | Down                          |
| [4,]  | hsa-miR-29c    | 2.06E-14          | 28.82          | Down                          | [23,] | hsa-miR-423-5p  | 2.19E-07          | 5.315          | Down                          |
| [5,]  | hsa-let-7a     | 3.93E-08          | 9.043          | Down                          | [24,] | hsa-miR-125b    | 1.48E-09          | -3.806         | Up                            |
| [6,]  | hsa-miR-205    | 0.0014706         | -8.747         | Up                            | [25,] | hsa-let-7f      | 0.1172602         | 5.343          | Down                          |
| [7,]  | hsa-miR-184    | 4.79E-14          | 11.418         | Down                          | [26,] | hsa-miR-18a     | 2.42E-07          | 3.395          | Down                          |
| [8,]  | hsa-miR-148b   | 2.34E-12          | 4.228          | Down                          | [27,] | hsa-miR-186     | 9.89E-07          | -11.678        | Up                            |
| [9,]  | hsa-miR-130a   | 4.11E-09          | 4.204          | Down                          | [28,] | hsa-miR-1180    | 2.38E-13          | -48.108        | Up                            |
| [10,] | hsa-miR-200b   | 8.34E-05          | -11.941        | Up                            | [29,] | hsa-miR-381     | 0.5850876         | 4.568          | Down                          |
| [11,] | hsa-miR-132    | 4.38E-16          | 22.983         | Down                          | [30,] | hsa-miR-142-5p  | 2.60E-11          | 4.312          | Down                          |
| [12,] | mmu-miR-495    | 1.90E-10          | 7.022          | Down                          | [31,] | hsa-miR-203     | 7.06E-05          | -1.894         | Up                            |
| [13,] | hsa-miR-378    | 0.0028767         | -1.878         | Up                            | [32,] | mmu-miR-140     | 1.39E-06          | 2.814          | Down                          |
| [14,] | hsa-miR-590-3P | 6.80E-08          | 6.608          | Down                          | [33,] | hsa-miR-34b     | 1.54E-06          | -2.887         | Up                            |
| [15,] | hsa-miR-210    | 2.24E-19          | 53.712         | Down                          | [34,] | hsa-miR-376c    | 9.03E-06          | 4.41           | Down                          |
| [16,] | hsa-let-7e     | 4.22E-09          | 7.599          | Down                          | [35,] | hsa-miR-195     | 0.0128161         | 2.697          | Down                          |
| [17,] | hsa-miR-429    | 0.0016299         | -4.885         | Up                            | [36,] | hsa-miR-26a     | 7.34E-05          | 2.473          | Down                          |
| [18,] | hsa-miR-1300   | 0.0143191         | 8.336          | Down                          | [37,] | hsa-miR-519b-3p | 0.0180488         | 7.599          | Down                          |
| [19,] | hsa-miR-601    | 5.65E-08          | -3.155         | Up                            |       |                 |                   |                |                               |

The p-values (t-test) and fold changes are calculated for each miRNA. Expression level of miRNA in serum from cancer patients are specified as up or down, compared with controls

**Supplementary Table S2: Coefficients and significance for the different miRNAs in the multivariate logistic regression model**

| <b>A. Stage I-IV</b> | <b>Estimate</b> | <b>Standard Error</b> | <b>z value</b> | <b>Pr(&gt; z )</b> |
|----------------------|-----------------|-----------------------|----------------|--------------------|
| <b>Mir125bCt</b>     | -0.61196        | 0.20374               | -3.004         | 0.00267            |
| <b>Mir200bCt</b>     | -0.70826        | 0.2757                | -2.569         | 0.0102             |
| <b>Mir203Ct</b>      | 0.15242         | 0.13294               | 1.146          | 0.25159            |
| <b>Mir205Ct</b>      | -0.1888         | 0.16654               | -1.134         | 0.25693            |
| <b>Mir34bCt</b>      | -0.05477        | 0.19162               | -0.286         | 0.77502            |
| <b>Mir429Ct</b>      | -0.93376        | 0.23035               | -4.054         | 5.04E-05           |
| <b>Intercept</b>     | 5.81644         | 1.08571               | 5.357          | 8.45E-08           |
| <b>B. Stage I-II</b> | <b>Estimate</b> | <b>Standard Error</b> | <b>z value</b> | <b>Pr(&gt; z )</b> |
| <b>Mir125bCt</b>     | -0.56696        | 0.19891               | -2.850         | 0.00437            |
| <b>Mir200bCt</b>     | -0.65911        | 0.27346               | -2.410         | 0.01594            |
| <b>Mir203Ct</b>      | 0.07711         | 0.13459               | 0.573          | 0.56668            |
| <b>Mir205Ct</b>      | -0.14427        | 0.17063               | -0.846         | 0.39782            |
| <b>Mir34bCt</b>      | -0.02313        | 0.20756               | -0.111         | 0.91126            |
| <b>Mir429Ct</b>      | -0.97141        | 0.24325               | -3.993         | 6.51e-05           |
| <b>Intercept</b>     | 5.64116         | 1.12070               | 5.034          | 4.81e-07           |

A is calculated for stage I-IV, and B is calculated for stage I-II.

**Supplementary Table S3: Correlation matrix of the six microRNAs included in the prediction model**

|           | <b>miR125bCt</b> | <b>miR200bCt</b> | <b>miR203Ct</b> | <b>miR205Ct</b> | <b>miR34bCt</b> | <b>miR429Ct</b> |
|-----------|------------------|------------------|-----------------|-----------------|-----------------|-----------------|
| miR125bCt | 1                | 0.207            | 0.757           | 0.686           | 0.341           | 0.011           |
| miR200bCt | 0.207            | 1                | 0.154           | 0.533           | 0.344           | 0.617           |
| miR203Ct  | 0.757            | 0.154            | 1               | 0.577           | 0.380           | 0.036           |
| miR205Ct  | 0.686            | 0.533            | 0.577           | 1               | 0.420           | 0.329           |
| miR34bCt  | 0.341            | 0.344            | 0.380           | 0.420           | 1               | 0.196           |
| miR429Ct  | 0.011            | 0.617            | 0.036           | 0.329           | 0.196           | 1               |

**Supplementary Table S4: When comparing the microRNA expression in tumor with the profile found in serum, 8 microRNAs were overlapping**

| <b>miRNA</b> | <b>Expr. Serum</b> | <b>Expr. Tumor</b> |
|--------------|--------------------|--------------------|
| hsa-miR-29c  | down               | down               |
| hsa-let-7a   | down               | down               |
| hsa-miR-130a | up                 | down               |
| hsa-miR-210  | down               | up                 |
| hsa-miR-125b | up                 | down               |
| hsa-let-7f   | down               | down               |
| hsa-miR-195  | down               | down               |
| hsa-miR-26a  | down               | down               |

The direction of expression for 3 of these microRNAs was in different direction in tumor compared with serum (shown in grey).

Supplementary Table S5: Procedures for blood sample handling

|                       | <b>Blood tubes</b>                     | <b>Collected</b>   | <b>Centrifugation force /<br/>duration</b> | <b>Stored until RNA<br/>isolation</b> |
|-----------------------|----------------------------------------|--------------------|--------------------------------------------|---------------------------------------|
| <b>Discovery set</b>  | Vacurette with serum<br>clot activator | before surgery     | 2400rcf /12 min                            | minus 80°C                            |
| <b>Validation set</b> | Vacurette with serum<br>clot activator | before CT scanning | 1811rcf/10 min                             | minus 80°C                            |

**Supplementary Table S6: A: RT Reaction mix components. B: Real Time PCR reaction mix components. C: Reverse transcription conditions. D: primer sequences for the different miRNAs****A. Reverse Transcription**

|                                                    |            |
|----------------------------------------------------|------------|
| Component Master mix volume 10 $\mu$ l reaction    | 1x $\mu$ l |
| 100mM dNTPs (with dTTP)                            | 0.10       |
| MultiScribe™ Reverse Transcriptase, 50 U/7 $\mu$ L | 0.67       |
| 10x Reverse Transcription Buffer                   | 1.00       |
| Rnase Inhibitor, 20 U/ $\mu$ L                     | 0.13       |
| Nuclease-free water                                | 2.80       |
| Total volume                                       | 4.70       |
| 3 $\mu$ l RT primer (specific for each miRNA)(5X)  | 2.00       |
| 3.3 $\mu$ l sample (30ng)                          | 3.30       |

**B. Real Time PCR**

|                                            |       |
|--------------------------------------------|-------|
| Master mix volume 10 $\mu$ l               | 1x    |
| TaqMan® Small RNA Assay (20x)              | 0.50  |
| Product from RT reaction                   | 0.70  |
| TaqMan® Universal PCR Master Mix(2x),noUNG | 5.00  |
| Nuclease-free water                        | 3.80  |
| Total volume                               | 10.00 |

**C. Reverse Transcription Reaction (30ng totRNA input)**

| Step type | Times (minutes) | Temp |
|-----------|-----------------|------|
| Hold      | 30              | 16°C |
| Hold      | 30              | 42°C |
| Hold      | 5               | 85°C |
| Hold      | $\infty$        | 4°C  |

**D. Primer sequences**

| MiRNA    | assay ID | sequence                 |
|----------|----------|--------------------------|
| miR-205  | 509      | UCCUUCAU UCCACCGGAGUCUG  |
| miR-125b | 449      | UCCCUGAGACCCUAACUUGUGA   |
| miR-200b | 2251     | UAAUACUGCCUGGUA AUGAUGA  |
| miR-34b  | 2102     | CAAUCACUAACUCCACUGCCA U  |
| miR-203  | 507      | GUGAAAUGUUUAGGACCACUAG   |
| miR-429  | 1024     | UAAUACUGUCUGGUA AAAACCGU |
| miR-1180 | 2847     | UUUCCGGCUCGCGUGGGUGUGU   |
